# Supplementary material for: Molecular profiling of dilated cardiomyopathy that progresses to heart failure
Source: JCI journal article supplement (doi:10.1172/jci.insight.86898), 2016-05-04

## SUPPLEMENTAL MATERIALS

### SUPPLEMENTARY TABLES

**Supplementary Table 1:** Echocardiographic parameters demonstrating development of DCM in PLN<sup>R9C/+</sup> mice.

| Age    | N | LVEDD (mm) | P-value vs. 8wk        | P-value vs. 18wk       | FS (%) | P-value vs. 8wk        | P-value vs. 18wk       |
|--------|---|------------|------------------------|------------------------|--------|------------------------|------------------------|
| 8wk    | 5 | 3.2 ± 0.1  |                        |                        | 48 ± 4 |                        |                        |
| 18wk   | 7 | 4.0 ± 0.2  | 1.5 x 10 <sup>-6</sup> |                        | 27 ± 4 | 9.6 x 10 <sup>-5</sup> |                        |
| 20.5wk | 8 | 4.8 ± 0.4  | 1.8 x 10 <sup>-6</sup> | 1.5 x 10 <sup>-4</sup> | 12 ± 4 | 2.0 x 10 <sup>-7</sup> | 9.9 x 10 <sup>-6</sup> |

Age is average age at echocardiography in PLN<sup>R9C/+</sup> mice. LVEDD, LV end-diastolic diameter; FS, fractional shortening.

**Supplementary Table 2:** Expression of cell type-specific marker genes demonstrates purity of non-myocyte and cardiomyocyte cell populations.

| <b>Cell Compartment</b>                                      | <b>Gene</b> | <b>Lineage</b> | <b>Wild Type</b> | <b>PLN<sup>R9C/+</sup></b> |
|--------------------------------------------------------------|-------------|----------------|------------------|----------------------------|
| Cardiomyocyte-specific genes in non-myocyte cell compartment | Actc1       | Cardiomyocyte  | 1.9%             | 2.6%                       |
|                                                              | Myh6        | Cardiomyocyte  | 2.2%             | 2.6%                       |
|                                                              | Myh7        | Cardiomyocyte  | 2.0%             | 2.5%                       |
|                                                              | Tnnc1       | Cardiomyocyte  | 1.6%             | 2.9%                       |
|                                                              | Tnni3       | Cardiomyocyte  | 1.8%             | 2.8%                       |
|                                                              | Tnnt2       | Cardiomyocyte  | 1.9%             | 2.7%                       |
| Non-myocyte-specific genes in myocyte cell compartment       | Postn       | Fibroblast     | 1.0%             | 0.4%                       |
|                                                              | Ddr2        | Fibroblast     | 0.3%             | 0.8%                       |
|                                                              | Thy1        | Fibroblast     | 0.4%             | 0.7%                       |
|                                                              | Col3a1      | Fibroblast     | 0.9%             | 0.6%                       |
|                                                              | Vim         | Mesenchymal    | 0.3%             | 0.6%                       |
|                                                              | Eng         | Endothelial    | 1.8%             | 0.8%                       |
|                                                              | Tie1        | Endothelial    | 3.5%             | 2.4%                       |
|                                                              | Cdh5        | Endothelial    | 3.2%             | 1.6%                       |
|                                                              | Tagln2      | Vascular SMC   | 0.7%             | 0.8%                       |
|                                                              | Myh11       | Vascular SMC   | 3.9%             | 3.6%                       |
|                                                              | Hcls1       | Hematopoietic  | 0.7%             | 1.0%                       |

Actc1 – cardiac  $\alpha$ -actin, Myh6 –  $\alpha$ -myosin heavy chain, Myh7 –  $\beta$ -myosin heavy chain, Tnnc1 – cardiac troponin C, Tnni3 –

cardiac troponin I, Tnnt2 – cardiac troponin T, Postn – periostin, Ddr2 – discoidin domain receptor 2, Thy1 – thymus cell antigen 10, Col3a1 – collagen  $\alpha$ -1(III), Vim – vimentin, Eng – endoglin, Tie1 – tyrosine-protein kinase receptor 1, Cdh5 – cadherin 5, Tagln2 – transgelin 2, Myh11 – myosin heavy chain 11, Hcls1 – hematopoietic lineage cell-specific protein

**Supplementary Table 3:** see attached excel file. All differentially expressed genes pre-DCM (sheet 1), with DCM (sheet 2) and with HF (sheet 3) in non-myocytes and cardiomyocytes (sheets 4-6, respectively). Normalized reads = reads per million library.

**Supplementary Table 4:** see attached excel file. All significantly enriched (FDR <0.01) IPA canonical pathways in non-myocytes pre-DCM (sheet 1), with DCM (sheet 2), and with HF (sheet 3), and in cardiomyocytes pre-DCM (sheet 4), with DCM (sheet 5), and with HF (sheet 6). FDR represents Benjamini-Hochberg adjusted p-value corrected for multiple hypothesis testing. Note, pathways with FDR <0.05 are shown for PreDCM cardiomyocytes given paucity of significant pathways at FDR <0.01.

**Supplementary Table 5:** see attached excel file. All significantly enriched (FDR <0.01) GO terms in non-myocytes pre-DCM (sheet 1), with DCM (sheet 2), and with HF (sheet 3), and in cardiomyocytes pre-DCM (sheet 4), with DCM (sheet 5), and with HF (sheet 6). FDR represents Bonferroni adjusted p-value corrected for multiple hypothesis testing. Note, GO terms with FDR <0.05 are shown for PreDCM cardiomyocytes given lack of GO terms with FDR <0.01.

**Supplementary Table 6:** see attached excel file. All significantly enriched (FDR <0.01) KEGG pathways in non-myocytes pre-DCM (sheet 1), with DCM (sheet 2), and with HF (sheet 3), and in cardiomyocytes pre-DCM (sheet 4), with DCM (sheet 5), and with HF (sheet 6). FDR represents Bonferroni adjusted p-value corrected for multiple hypothesis testing. Note, KEGG pathways with nominal p-value <0.05 are shown for PreDCM myocytes given lack of pathways with FDR <0.05.

**Supplementary Table 7:** see attached excel file. All significantly enriched IPA canonical pathways (FDR <0.01; sheet 1), GO terms (FDR <0.01; sheet 2), and KEGG pathways (FDR <0.01; sheet 3) in non-myocytes and cardiomyocytes (sheets 4-6 respectively) from MHC<sup>R403Q/+</sup> mice with HCM.

**Supplementary Table 8:** see attached excel file. Significantly enriched IPA canonical pathways (FDR <0.05) derived from non-myocyte (sheets 1 & 2) and cardiomyocyte (sheets 3 & 4) genes that display predominant differential expression in either DCM or HCM. Pathways were identified using genes that were (1) only differentially expressed in DCM or HCM, or (2) genes that were differentially expressed in both cardiomyopathies but with substantially greater fold change in either DCM or HCM. Pathways highlighted in red were common to both cardiomyopathies. No pathways were significantly enriched in HCM myocytes.

**Supplementary Table 9:** see attached excel file. Predicted upstream regulators (transcription factors and transcriptional coactivators, cytokines and growth factors, and kinases), that are common (sheet 1) or unique (sheets 2 & 3) to HCM and DCM non-myocytes (NM) and unique to HCM (sheet 4) and DCM (sheet 5) cardiomyocytes. Regulators were deemed significantly enriched if Z-score was  $\geq \pm 2$  and p-value was <0.05.

**Supplementary Table 10:** see attached excel file. Expression levels of common cytokines in whole LV tissue with DCM and HCM, and age-matched wild type controls. Data expressed are normalized reads per million reads of the RNA-seq library.

**Supplementary Table 11:** Q-PCR primers.

| Gene            | Forward Primer                                         | Reverse Primer                 | Detection  |
|-----------------|--------------------------------------------------------|--------------------------------|------------|
| <i>Tgfb1</i>    | 5' – GTGGAAATCAACGGGATCAG – 3'                         | 5' – TTCTCTGTGGAGCTGAAGCA – 3' | SYBR green |
| <i>Tgfb2</i>    | 5' – CAGCAGTCATGCTCTTCAGC – 3'                         | 5' – TCCTTGCATTACACCTCCAG – 3' | SYBR green |
| <i>Tgfb3</i>    | 5' – GATGAGCACATAGCCAAGCA – 3'                         | 5' – ATTGGGCTGAAAGGTGTGAC – 3' | SYBR green |
| <i>Gdf15</i>    | 5' – CCGAGAGGACTCGAACTCAG – 3'                         | 5' – TTCAGGGGCCTAGTGATGTC – 3' | SYBR green |
| <i>Polr3h</i>   | 5' – ATGTTTCGTGCTGGTGGAGAT – 3'                        | 5' – GCGGAAATGGACTTTGGTGT – 3' | SYBR green |
| <i>Ppara</i>    | ThermoFisher Scientific primer-probe set Mm00440939_m1 |                                | FAM        |
| <i>Ppargc1a</i> | ThermoFisher Scientific primer-probe set Mm01208835_m1 |                                | FAM        |
| <i>Ppargc1b</i> | ThermoFisher Scientific primer-probe set Mm00504730_m1 |                                | FAM        |
| <i>Tbx15</i>    | ThermoFisher Scientific primer-probe set Mm00447443_m1 |                                | FAM        |
| <i>Ndufs7</i>   | ThermoFisher Scientific primer-probe set Mm01144210_m1 |                                | FAM        |
| <i>Cox7a1</i>   | ThermoFisher Scientific primer-probe set Mm0438296_m1  |                                | FAM        |
| <i>Atp5a1</i>   | ThermoFisher Scientific primer-probe set Mm00431960_m1 |                                | FAM        |
| <i>Polr3h</i>   | ThermoFisher Scientific primer-probe set Mm00513483_m1 |                                | VIC        |

## SUPPLEMENTARY FIGURES

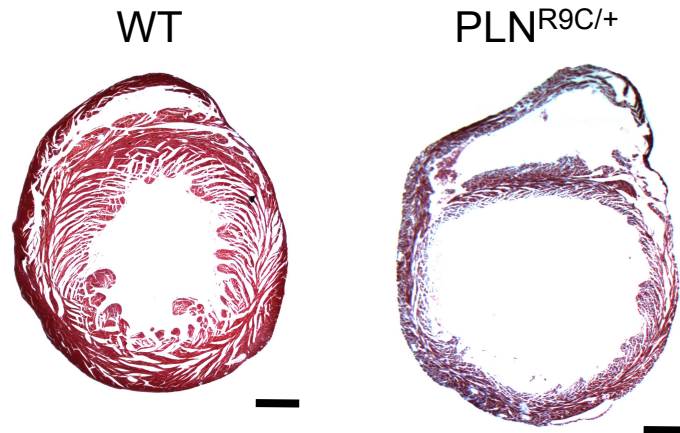

**Supplementary Figure 1. PLN<sup>R9C/+</sup> mice exhibit biventricular dilatation and increased cardiac fibrosis.** Heart cross-sections (scale bar=1mm) stained with Masson's trichrome at 22-weeks of age demonstrates profound biventricular dilatation and extensive biventricular fibrosis in PLN<sup>R9C/+</sup> mice compared to age-matched wild type control animals.

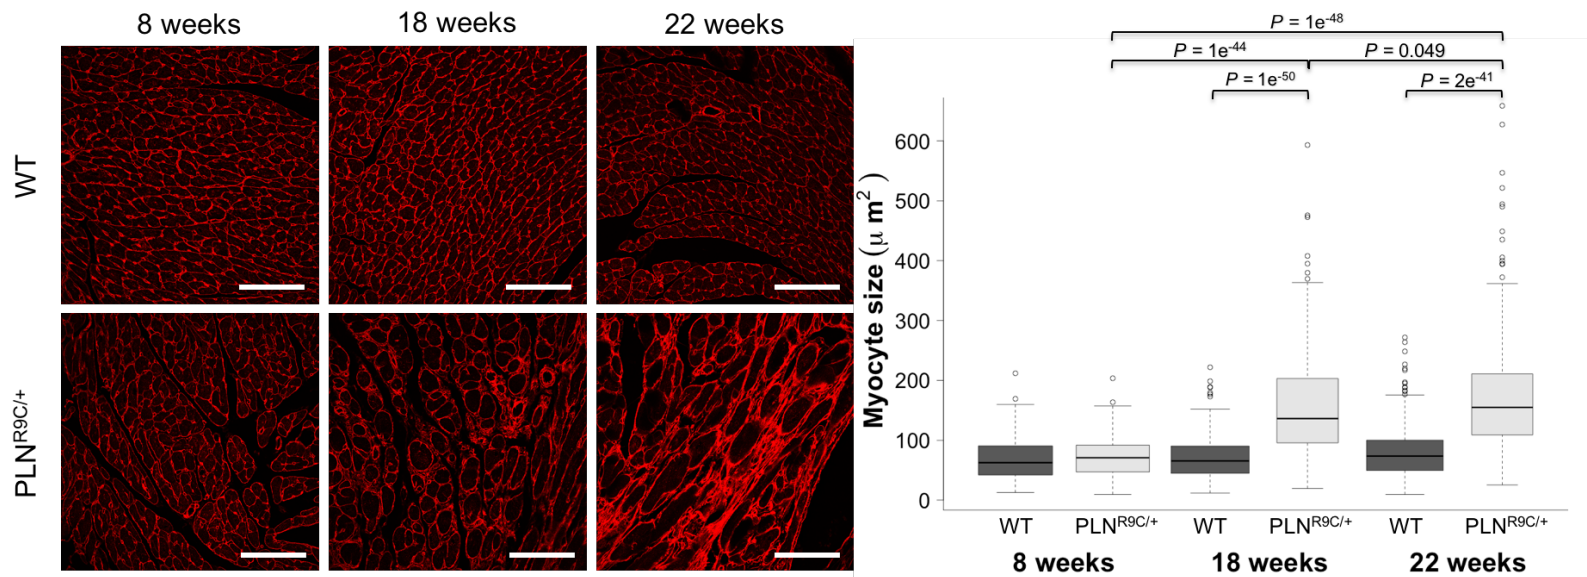

**Supplementary Figure 2. PLN<sup>R9C/+</sup> mice develop cardiomyocyte hypertrophy with disease progression.** Confocal microscopy (scale bar=75μm) and quantification of myocyte size at all stages from WGA-stained (red) LV sections. Data quantitated were individual LV slices at 10 levels (apex to base) from n=3 mice per group; *t*-test ± standard deviation.

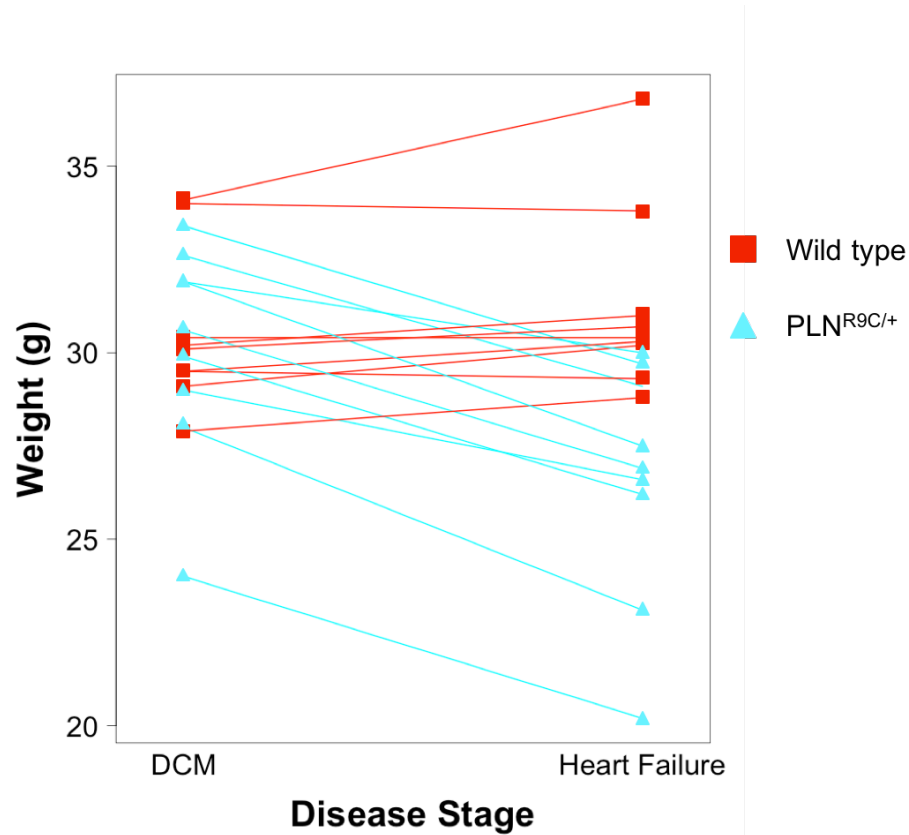

**Supplementary Figure 3.  $PLN^{R9C/+}$  mice develop pre-terminal cachexia.**  $PLN^{R9C/+}$  or wild type mice at 18-weeks-of-age (DCM stage) have similar body weight ( $30.1 \pm 2.7g$  vs.  $30.5 \pm 2.0g$ ,  $p=0.75$ ) but with progression to HF, body weight falls significantly in  $PLN^{R9C/+}$  mice ( $26.6 \pm 3.0g$  vs.  $31.3 \pm 2.4g$ ,  $p=0.003$ ).  $PLN^{R9C/+}$  mice were weighed between 21- and 25-weeks-of-age when objective evidence of overt HF was present; wild type mice were weighed at ~22-weeks-of-age.



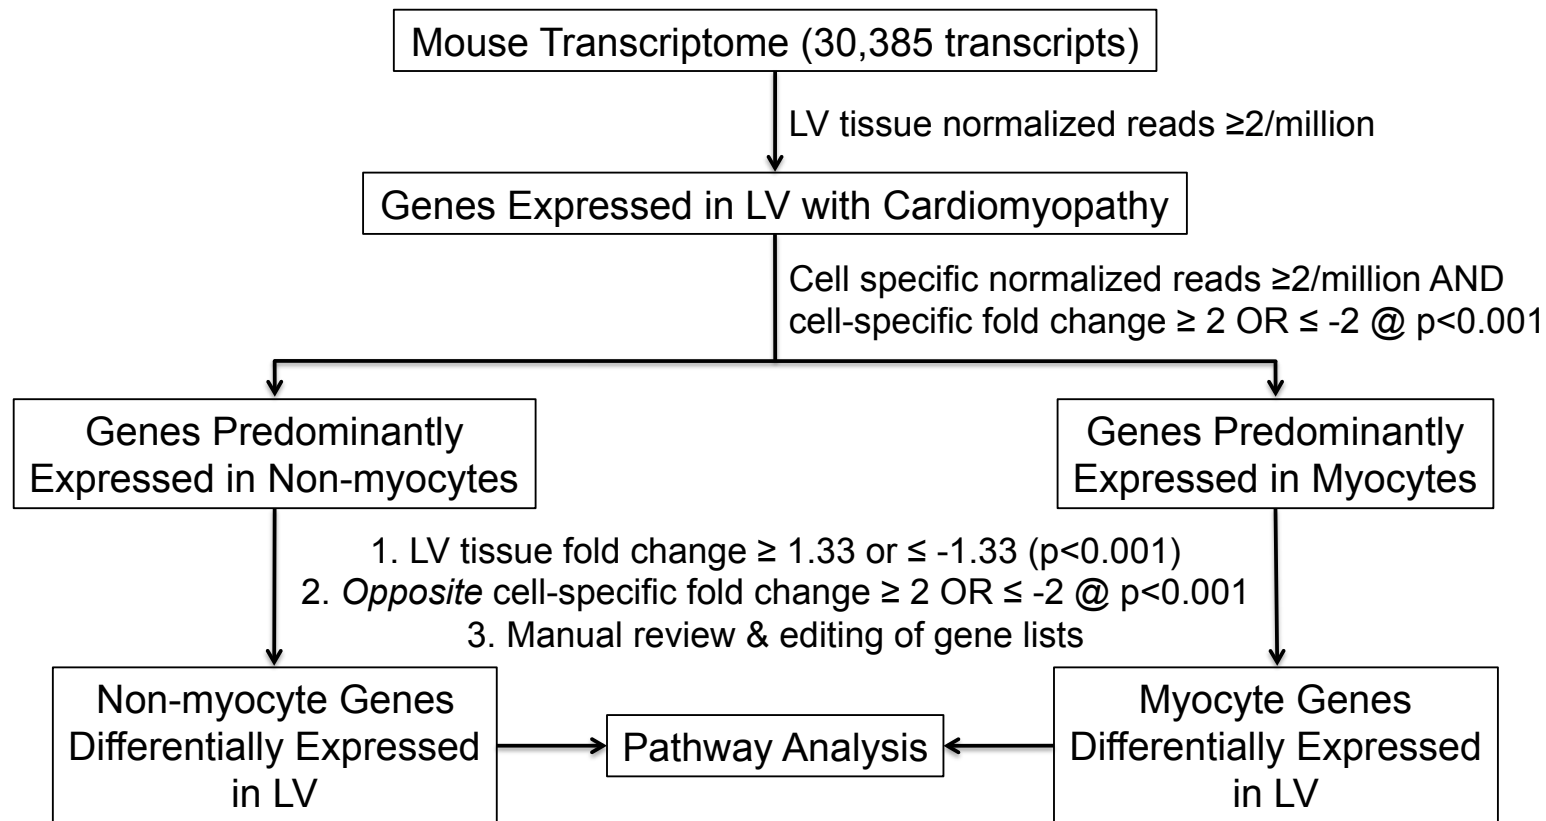

**Supplementary Figure 4 (Above). Bioinformatics pipeline for analysis of RNA-seq gene data.** Of all transcripts in mm9, genes were identified as being expressed in LV tissue if read depth was  $\geq 2$  reads/million reads in the RNA-seq library. Genes expressed in the heart were defined as predominantly expressed in non-myocytes or myocytes if read depth from isolated cell fractions was  $\geq 2$  reads/million reads in the RNA-seq library AND expression was  $\geq 2$  fold higher in non-myocyte or myocyte cells. These cell-specific gene lists were then edited to remove genes where differential expression was driven by changes in the opposite cell type and final lists were edited manually to ensure proper parsing of genes. Final gene lists included non-myocyte genes differentially expressed in whole LV tissue and myocyte genes differentially expressed in whole LV tissue. These gene lists were subjected to pathway analysis.

**Supplementary Figure 5 (Below). Losartan does not prevent the onset of DCM in PLN<sup>R9C/+</sup> mice.** (A) Masson trichrome (MT)-stained heart cross-sections demonstrate marked biventricular dilatation and fibrosis (scale bar=1mm). (B) LV end diastolic diameter (LVEDD) and fractional shortening (FS) by echocardiography demonstrate progressive dilatation and systolic dysfunction irrespective of treatment group (P=NS for all age-matched comparisons; n=4-5 mice per treatment group). (C) Light microscope images of MT-stained LV tissue demonstrates marked fibrosis. (20x magnification; scale bar=100 $\mu$ m). (D) Quantification of fibrotic area from LV at DCM stage (18 weeks) in treated and untreated animals (n=3).

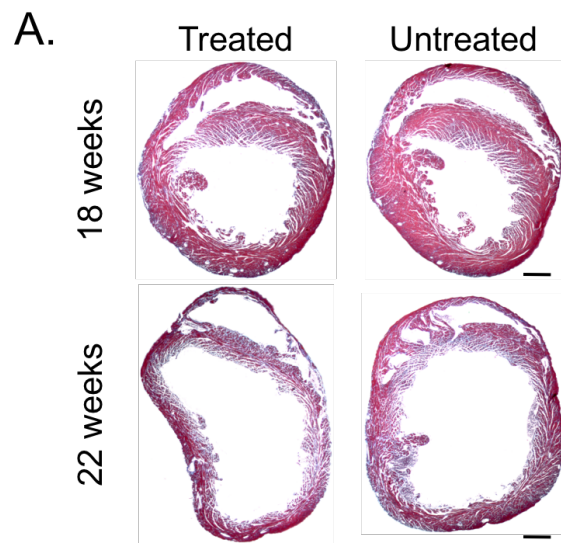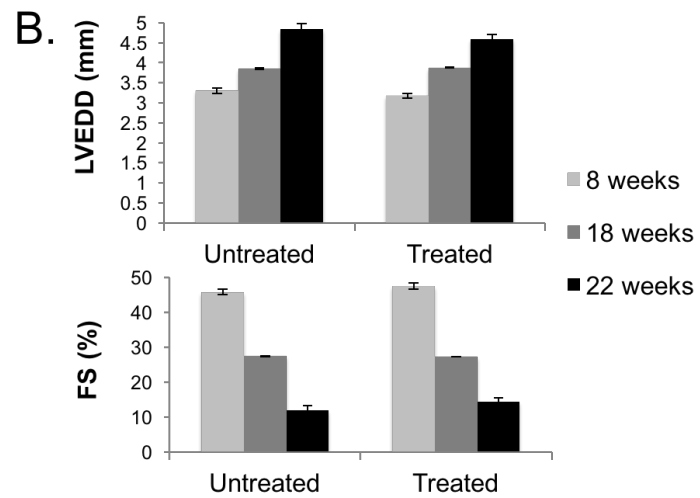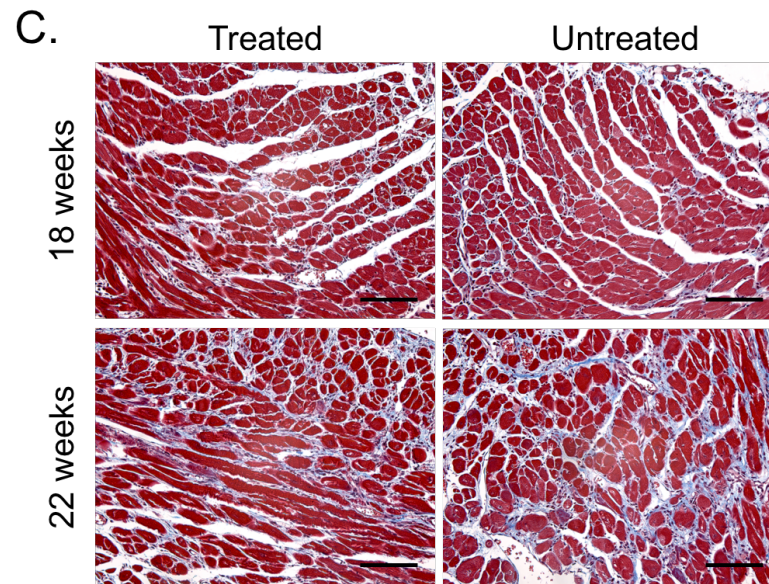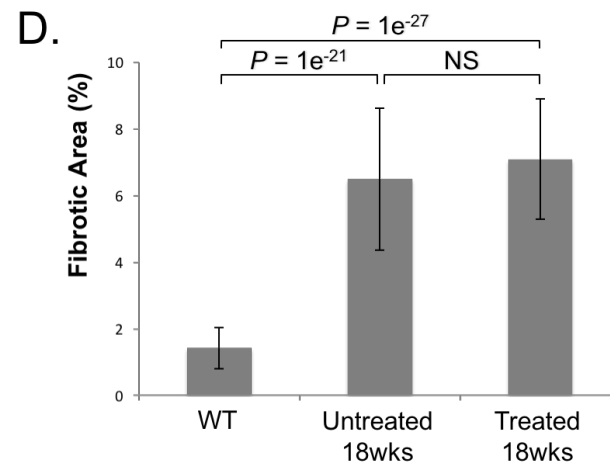

Supplement: sd1 [file 1]
